# Supplementary material
Source: publisher figshare collection journal article supplement (https://gsajournals.figshare.com/ndownloader/files/26820914)
Supplement: Supplementary file 1 [file 26820914]

## Sheet: Sheet1
Reagents Table Basic information of reagents required for the experiment
Data type	Experimental species	Symbol/name used in publication	Source – public	Identifiers	Comments
gene (source not applicable)	mouse	Brpf1	NA	ID_source:ENSMUSG00000001632
strain, strain_background	C57BL/6		Slac,Shanghai
antibody	mouse	mouse anti-GABA antibody	Sigma, A0310	RRID: AB_476667	Immunofluorescence
antibody	rabbit	rabbit anti-PV antibody	Proteintech, 26521-1-ap	RRID: AB_2880541	Immunofluorescence
antibody	rabbit	rabbit anti-SST antibody	Proteintech, 17512-1-ap	RRID: AB_2195910	Immunofluorescence
antibody	mouse	mouse anti-MAP2 antibody	Proteintech, 67015-1-ig	RRID: AB_2882331	Immunofluorescence
antibody	mouse	mouse anti-GFP antibody	Proteintech, 66002-1	RRID: AB_11182611	Immunofluorescence
antibody	rabbit	rabbit anti-GFP antibody	Proteintech, 50430-2-AP	RRID: AB_11042881	Immunofluorescence
chemical compound, drug	NA	AAV-scramble	BrainVTA, WuHan		infection
chemical compound, drug	NA	AAV-shbrpf1	BrainVTA, WuHan		infection
chemical compound, drug	NA	HBSS	Thermo,14185052		Primary Neuron Culture
chemical compound, drug	NA	HEPES	Thermo, 15630106		Primary Neuron Culture
chemical compound, drug	NA	DNase	Sigma, D4527		Primary Neuron Culture
chemical compound, drug	NA	trypsin	Sigma, T8658-1vl		Primary Neuron Culture
chemical compound, drug	NA	Neurobasal medium	Gibco, 211030049		Primary Neuron Culture
chemical compound, drug	NA	fetal bovine serum	Gibco, 10091148		Primary Neuron Culture
chemical compound, drug	NA	B27 supplement	Gibco, 17504044		Primary Neuron Culture
chemical compound, drug	NA	GlutaMAX-1	Gibco, 35050061		Primary Neuron Culture
chemical compound, drug	NA	poly-L-lysine	Sigma, P9155		Primary Neuron Culture
chemical compound, drug	NA	paraformaldehyde	Biosharp, BL539A		Immunofluorescence
chemical compound, drug	NA	PBS	Hyclone, SH30243.01		Immunofluorescence
chemical compound, drug	NA	Triton X-100	Sigma, X-100		Immunofluorescence
chemical compound, drug	NA	goat serum	Proteintech, b900780		Immunofluorescence
chemical compound, drug	NA	DAPI	Sigma, D9542		Immunofluorescence
chemical compound, drug	NA	artificial cerebrospinal fluid	R&D,3525		whole-cell patch-clamp recording
chemical compound, drug	NA	tetrodotoxin	Abcam, ab120055		whole-cell patch-clamp recording
chemical compound, drug	NA	NBQX	Sigma，N183		whole-cell patch-clamp recording
chemical compound, drug	NA	D-AP5	Abcam, ab120003		whole-cell patch-clamp recording
chemical compound, drug	NA	Trizol	Thermo, 15596018		RNA extraction
chemical compound, drug	NA	reverse transcription kit	Accurate Biotechnology Co., Ltd, AG11705		reverse transcription
chemical compound, drug	NA	TB Green Premix Ex Taq	Takara, rr420a		RT-qPCR
chemical compound, drug	NA	DMEM medium	Gibco, 11960044		migration
chemical compound, drug	NA	optimum cutting temperature compound	Sakura,4583		Tissue block embedding
software, algorithm	NA	Clampfit software	Molecular Devices,USA	RRID:SCR_011323	Electrophysiological Recordings and analysis
software, algorithm	NA	mini-analysis software	Synaptosft, Inc,USA	RRID:SCR_002184	Electrophysiological Recordings and analysis
software, algorithm	NA	Nanodrop	Thermo Scientific,USA	RRID:SCR_018042	RNA concentration determination
software, algorithm	NA	ImageJ Fiji	National Institutes of Health. USA	RRID:SCR_002285	Statistical Analysis
software, algorithm	NA	Confocal microscope	Leica Microsystems. German	RRID:SCR_018169	Statistical Analysis
software, algorithm	NA	STAR	ENCODE, the National Human Genome Research Institute. USA	RRID:SCR_015899	mRNA sequencing and bioinformatic analyses
software, algorithm	NA	StringTie	Center For Computational Biology, Johns Hopkins University. USA	RRID:SCR_016323	mRNA sequencing and bioinformatic analyses
software, algorithm	NA	DESeq2	Bioconductor,USA	RRID:SCR_015687	mRNA sequencing and bioinformatic analyses
software, algorithm	NA	Gene Expression Omnibus	National Institutes of Health. USA	RRID:SCR_005012	mRNA sequencing and bioinformatic analyses
software, algorithm	NA	David website	Laboratory of Human Retrovirology and Immunoinformatics (LHRI), NIH. USA	RRID:SCR_001881	mRNA sequencing and bioinformatic analyses
software, algorithm	NA	GraphPad Prism 8.0	GraphPad Software. USA	RRID:SCR_002798	Statistical Analysis
other
